# Supplementary material
Source: publisher site journal article supplement (https://www.spandidos-publications.com/2220/downloadSupplementary)

**Figure S1.** Body appearance and body weights of mice implanted with Caco-2 xenografts. (A) Mouse appearance on day 17. Scale bar, 1 cm. (B) Mouse weight was measured on days 0, 1, 5, 7, 12, 15 and 17. n.s., not significant. EpMab16, epithelial cell adhesion molecule monoclonal antibody.

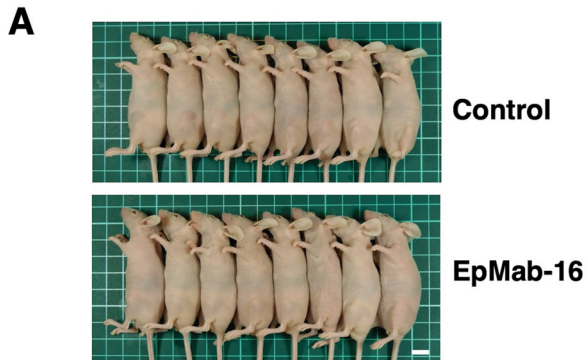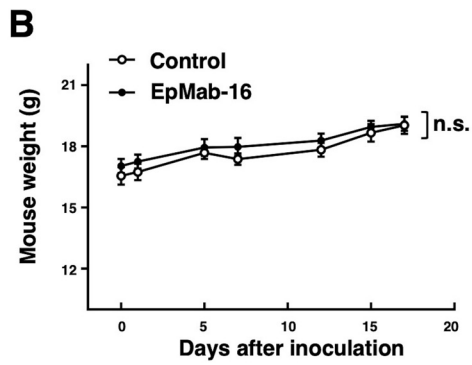

Supplement: Supplementary file [file downloadSupplementary]
